# Supplementary material
Source: PubMed Central journal article supplement (PMC4776090)
Supplement: supp_WNL.0000000000002316_1.26.16_Safety_and_immunologic_effects.pdf [file supp_WNL.0000000000002316_1.26.16_Safety_and_immunologic_effects.pdf]

## Safety and immunologic effects of high- vs low-dose cholecalciferol in multiple sclerosis

التأثيرات المناعية و سلامة الجرعات العالية مقارنة بالمنخفضة من الكوليكالسيفيرول لدى مرضى التصلب المتعدد

**الهدف:** دراسة سلامة و تحديد التأثيرات المناعية للجرعات العالية مقارنة بالمنخفضة من الكوليكالسيفيرول لدى مرضى التصلب المتعدد.

**طرق البحث:** تضمنت هذه الدراسة المبدئية العشوائية المزدوجة التعمية 40 مريض لديهم تصلب متعدد من النمط الناكس والهاجع في مركز واحد. تم توزيع المرضى عشوائيا لتناول 10400 وحدة دولية أو 800 وحدة دولية من الكوليكالسيفيرول يوميا لمدة ست شهور. تم تقييم الدراسة عند البدء و بعد ثلاثة شهور ثم ستة شهور.

**النتائج:** كان متوسط ارتفاع ال-25 هيدروكسي فيتامين د بين بدء الدراسة وحتى اخر زيارة أكبر لدى مجموعة الجرعة العالية (34.9 ng/mL; 95% confidence interval [CI] 25.0-44.7 ng/mL) مقارنة بمجموعة الجرعة المنخفضة (6.9 ng/mL; 95% CI 1.0-13.7 ng/mL). التأثيرات الجانبية كانت طفيفة ولم تختلف بين المجموعتين. حدثت نوبتي نكس، واحدة في كل مجموعة. في مجموعة الجرعة العالية، وجدنا انخفاض بنسبة الخلايا التائية التالية T interleukin-17(+), CD4(+), CD4(+), T cells (p=0.03), CD161(+), CD4(+), T cells (p=0.021) مع ارتفاع مرافق في نسبة خلايا الذاكرة المركزية (p = 0.018) والساذجة (p = 0.04). هذه التأثيرات كانت غير ملاحظة لدى مرضى مجموعة الجرعة المنخفضة.

**الاستنتاجات:** إن تناول الكوليكالسيفيرول بجرعة 10400 وحدة دولية يوميا آمن و محتمل من قبل مرضى التصلب المتعدد و يحدث تأثيرات معدلة للمناعة متعددة المظاهر، بما يتضمن انخفاض إنتاج interleukin-17 من قبل T cells (+) CD4 و انخفاض نسبة خلايا الذاكرة المؤثرة T cells (+) CD4 و ارتفاع مرافق لخلايا الذاكرة المركزية T cells (+) CD4 والخلايا الساذجة.

**درجة الدليل:** تقدم هذه الدراسة دليلا من الدرجة الأولى أن مكملات الكوليكالسيفيرول بمقدار 10400 هي آمنة و جيدة التحمل لدى مرضى التصلب المتعدد وتحدث تأثيرات معدلة للمناعة متعددة المظاهر.

**Objective:** To study the safety profile and characterize the immunologic effects of high- vs low-dose cholecalciferol supplementation in patients with multiple sclerosis (MS).

**Methods:** In this double-blind, single-center randomized pilot study, 40 patients with relapsing-remitting MS were randomized to receive 10,400 IU or 800 IU cholecalciferol daily for 6 months. Assessments were performed at baseline and 3 and 6 months.

**Results:** Mean increase of 25-hydroxyvitamin D levels from baseline to final visit was larger in the high-dose group (34.9 ng/mL; 95% confidence interval [CI] 25.0–44.7 ng/mL) than in the low-dose group (6.9 ng/mL; 95% CI 1.0–13.7 ng/mL). Adverse events were minor and did not differ between the 2 groups. Two relapses occurred, one in each treatment arm. In the high-dose group, we found a reduction in the proportion of interleukin-17(+)CD4(+) T cells ( $p = 0.016$ ), CD161(+)CD4(+) T cells ( $p = 0.03$ ), and effector memory CD4(+) T cells ( $p = 0.021$ ) with a concomitant increase in the proportion of central memory CD4(+) T cells ( $p = 0.018$ ) and naive CD4(+) T cells ( $p = 0.04$ ). These effects were not observed in the low-dose group.

**Conclusions:** Cholecalciferol supplementation with 10,400 IU daily is safe and tolerable in patients with MS and exhibits in vivo pleiotropic immunomodulatory effects in MS, which include reduction of interleukin-17 production by CD4(+) T cells and decreased proportion of effector memory CD4(+) T cells with concomitant increase in central memory CD4(+) T cells and naive CD4(+) T cells.

**Level of Evidence:** This study provides Class I evidence that cholecalciferol supplementation with 10,400 IU daily is safe and well-tolerated in patients with MS and exhibits in vivo pleiotropic immunomodulatory effects.

---

**Translator:** Abdulrahman Masrani MD, Department of Interventional Radiology, Rush University Medical Center, Chicago, IL

**Translation Reviewer:** Yousef Hannawi MD, Department of Neurology, Ohio State University, Columbus, OH
